# Supplementary material for: Identification and expression analysis of ERF transcription factor genes in petunia during flower senescence and in response to hormone treatments
Source: PubMed Central journal article supplement — J Exp Bot. 2010 Oct 25;62(2):825–40. doi: 10.1093/jxb/erq324 (PMC3003824; doi:10.1093/jxb/erq324), 2010-10-25
Supplement: supp_erq324_00052860-file001.pdf [file supp_erq324_00052860-file001.pdf]

**Identification and expression analysis of *ERF* transcription factor genes in petunia during flower senescence and in response to hormone treatments**

Juanxu Liu\*, Huinan Wang\*, Jingyu Li, Zhaodi Fu, Juan Liu and Yixun Yu 

College of Horticulture, South China Agricultural University, Guangzhou 510642, China

 Yixun Yu

E-mail: yuyixun@scau.edu.cn

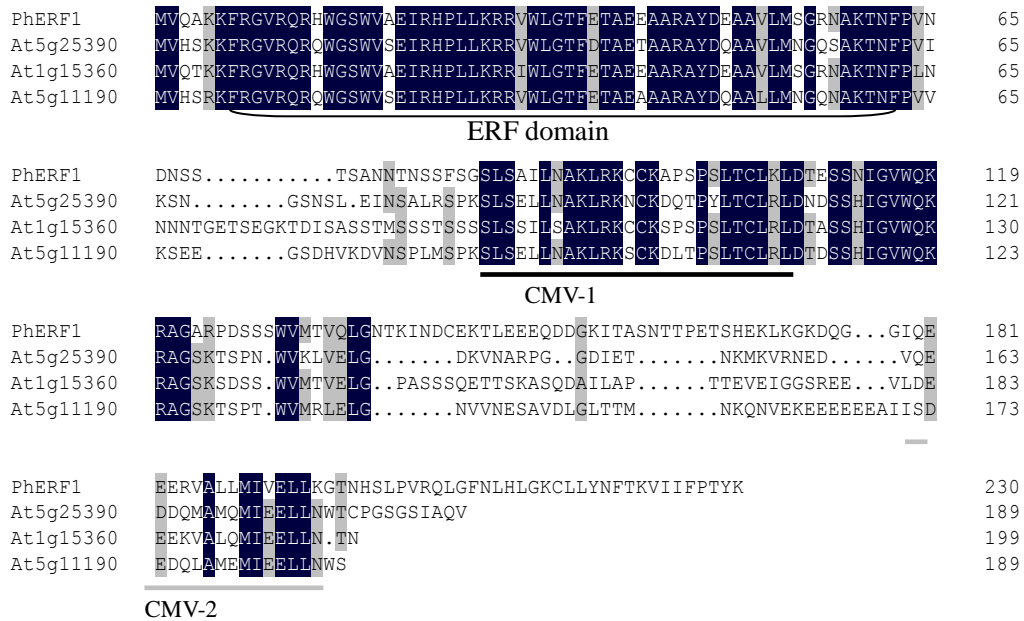

**Supplementary Fig. S1a:** Amino acid sequence alignment of Group V ERFs that includes PhERF1, At1g15360/SHN1, At5g11190/SHN2, and At5g25390/SHN3 using DNAMAN program. Conserved residues are shaded in black. Grey shading indicates similar residues in three out of four of the sequences. The filled black bar below the sequences represents the CMV-1 motif and the gray bar below the sequences represents the CMV-2 motif.

|                   |                                                                     |     |
|-------------------|---------------------------------------------------------------------|-----|
| At1g53910         | MCGGAIISDFIPPPRS.LRVVTSEFIWP..DLK...KNLKSGSKSSKNRSNFFDFDAEF EADFQGF | 59  |
| At3g14230         | MCGGAIISDFIPPPRS.LRVVTNEFIWP..DLK...NKVKASKKRSNKRSDFFDLDDD EADFQGF  | 59  |
| PhERF2            | MCGGAIISDYIPNRTSRRLTAELLWGRS.DLSKSKNPNPNYHSKPLR.SQIVDLDDD EADFQGF   | 64  |
| PhERF3            | MCGGAIISDLVPSRRTSRRLTADLLWGS.DLK...KNPNYHSKPLRSKFFIDLDF EADFQGF     | 62  |
| PhERF4            | MCGGAIISDLIP..RRDRRASSTDLWP.....TSADFWPNASFSPKPTSSL                 | 44  |
| <b>CMVII-1</b>    |                                                                     |     |
| At1g53910         | KDDSSIDCDDDFDVGDFADVKEFVFTSTPKPAVS..AAEAGSVFGKVTGLDGDAAEKSANRKRK    | 122 |
| At3g14230         | KDDSAFDCEDD...DDVFVNVKPFVFTATTKPVASAFVSTVGSAYAKKTVE SAEQAEKSSKRKRK  | 121 |
| PhERF2            | KD....FSDD.....EDVKEPFAFSA PKQST.....GSKSVKSADS.EKDADSSSKRKRK       | 108 |
| PhERF3            | S.....DDIKPEFGSKSVKSAD.....ANCEEADKSSKRKRK                          | 93  |
| PhERF4            | S.....TQKVEVTPKRAQPTT.....EQIEKSKKRQRK                              | 72  |
| At1g53910         | NOYRGIRQRPWGKWAAEIRDPRKRGARLWLGTFKTAEEAARAYDAAARRIRGSKAKVNFPEE.NMK  | 186 |
| At3g14230         | NOYRGIRQRPWGKWAAEIRDPRKGSREWLGTFTAEAAARAYDAAARRIRGSKAKVNFPEEKNPS    | 186 |
| PhERF2            | NOYRGIRQRPWGKWAAEIRDPSKGVVWVWLGTFNTAEAAARAYDVEARRIRGNKAKVNFPEE..AP  | 171 |
| PhERF3            | NOYRGIRQRPWGKWAAEIRDPRKGRVWVWLGTFNSAEAAARAYDVEARRIRGNKAKVNFPEE..TP  | 156 |
| PhERF4            | NLYRGIRQRPWGKWAAEIRDPRKGVVWVWLGTFNTAEAAARAYDSEARRIRGNKAKVNFPEE....  | 133 |
| <b>ERF domain</b> |                                                                     |     |
| At1g53910         | ANSQKR.SVKAN.LQKPVAKPN.....PNPSPALVQNSNISFEN...MCFMEEKHQVSNNNNN     | 239 |
| At3g14230         | VVSQKRPSAKTNNLQKSVAKPNKSVTLVQQPPHLSQQYCNNSFDNSFGDMSFMEEKPQMYNN...   | 248 |
| PhERF2            | VPSSRR.AVKVN.PQKVLPSLD...SVQPDTTVMNNLRNGYYDS...LGFLEEKPVAKQYGYE     | 226 |
| PhERF3            | VSASRR.TVKQN.PQKVEESSN...TVQLNTFNFCNNLDSGCYDS...LDFVEEKPTAKQYAYE    | 211 |
| PhERF4            | ...DNHYSTHPQ.PQRSIGYDS.....YDTCYNS.....HEVNNS...                    | 164 |
| At1g53910         | QFGMTNSVDAG.....CNGYQYFSSDQGSNSFDCSEFGWSDQAPITPDISSAVINNNNS..AL     | 295 |
| At3g14230         | QFGLTNSFDAGG.....NNGYQYFSSDQGSNSFDCSEFGWSDHGPKTPEISSMLVNNNE...AS    | 304 |
| PhERF2            | DGGST.SVDIGFDSFAPSAGADIYFNSDVGSNSFDCSDFGWGEPCTRTPEISSVLSAAIESNEAQ   | 290 |
| PhERF3            | DVCIT.AGDMGLGSFSPSAGADVYFTSDEGSNTFDCSDFGWGEPGSRTPEISSVLSAVAENGQTQ   | 275 |
| PhERF4            | .....YG.....IIENTEPVNNNDQNCQLKEQEKEENEVEKISEELMAYES...LMK           | 207 |
| At1g53910         | FVEEANPAKKLK.....SMDFETPYNNTEWDASLD.....FLNEDAVTTQD.....            | 336 |
| At3g14230         | FVEETNAAKKLPNSDESDDLMAFLDNALWDTPLEVE.....AMLGADAGAVTQ.....          | 353 |
| PhERF2            | FVEDARPEKKLSDPNNPVADDGNTVNSELSAFESEMFLQIPYLEGNWDASADTFLNLT SAT      | 355 |
| PhERF3            | FVEDASPAKRLKSCTNNSVQR                                               | 296 |
| PhERF4            | FYEIPYVDGQSV AATMNPAAEA.....                                        | 229 |
| At1g53910         | .NGANPMDLWSIDEIHS MIGGVF                                            | 358 |
| At3g14230         | .EEENPVELWLSLEINFMLE GDF                                            | 375 |
| PhERF2            | QDGENAMDLSFDVPSLMGGVY                                               | 378 |
| PhERF3            |                                                                     |     |
| PhERF4            | .MGGGMDLWSFDVSPVSPAH                                                | 251 |

**Supplementary Fig. S1b:** Amino acid sequence alignment of Group V ERFs that includes PhERF2, PhERF3, PhERF4, At1g53910/RAP2.12 and At3g14230/RAP2.2, using DNAMAN program. Conserved residues are shaded in black. Grey shading indicates similar residues in four out of five of the sequences. The filled black bar below the sequences represents the CMVII-1 motif.

|           |                                                                    |     |
|-----------|--------------------------------------------------------------------|-----|
| At1g28370 | MPNITMGLKPDVPAPTNPTHHESNAAKEIRYRGVRRKPWGRYAAEIRDVPKKTRVWLGTFDTAQQA | 66  |
| At1g50640 | MRRGRGSSAVAGPTVVAAINGSVKEIRFRGVRRKPWGRFAAEIRDVPKKARVWLGTFDSAEAA    | 63  |
| At1g53170 | MPNITMGLKPDVPAPTNPTHHESNAAKEIRYRGVRRKPWGRYAAEIRDVPKKTRVWLGTFDTAQQA | 66  |
| PhERF6    | MAPKEKGGATIGKVNSSKEVHYRGVRRKPWGRYAAEIRDVPKKSRVWLGTFDTAEAA          | 58  |
| PhERF7    | MRHRKSSELNRPRSDIPKQPES.DPPRYRGVRRKPWGRFAAEIRDVPKKTRVWLGTFDTAEAA    | 62  |
| PhERF8    | MRRGRAAAAAVFAAVNGEMNG...SIRFRGVRRKPWGRFAAEIRDVPKKTRVWLGTFDSAEAA    | 60  |
|           | <b>ERF domain</b>                                                  |     |
| At1g28370 | ARAYDAAARDFRGVKAKTNEGV.....IVGSSPTQSSTVVDSPPTAARFIT.....           | 111 |
| At1g50640 | ARAYDSAARNLRGPKAKTNEPIDSSSPPPNLRFNQIRNQNQNQVDFPMDHRLFTDHQQQFPVNR   | 129 |
| At1g53170 | ARAYDAAARDFRGVKAKTNEGV.....IVGSSPTQSSTVVDSPPTAARFIT.....           | 111 |
| PhERF6    | AKAYDAAAREFRGAKAKTNEPLD.....DLKINVVEKKYNDKSYSPSSSTVESSR..DGAVN     | 115 |
| PhERF7    | ARAYDDAARALRGSKAKTNEPV.....VPVTTTIQNTTGVSP..GQFELFP.....R          | 107 |
| PhERF8    | ARAYDAAARTLRGPKAKTNEPL.....PHHPYNQSFNNPNNEG..VNSRIYPQDNP..VITQR    | 115 |
| At1g28370 | PPHLELSLGGGGACRRKIPLVHPVYY.....YNMATYPKMT                          | 147 |
| At1g50640 | PTSSSMSTVESFSGPRPTMKPATT.....KRYPRTPPVV                            | 165 |
| At1g53170 | PPHLELSLGGGGACRRKIPLVHPVYY.....YNMATYPKMT                          | 147 |
| PhERF6    | VDSSPLDLSLGGSNIGHNSVMFPLQNHQLRTFGPPTVNHMYYLEALARAGVINLEKNQPKKTVDFL | 181 |
| PhERF7    | PACSSMSTLESSESGPRGAGSGHHKVVGATRLK.....IPRPVLIP                     | 148 |
| PhERF8    | PTSSGMSSTVESFSGPRPPLLRQQTVP.....SRKYPRSPPVV                        | 153 |
| At1g28370 | TCGVQSESETSSVVDFEGGAGKISPP.....LDLNLNLPPEAE                        | 185 |
| At1g50640 | PEDCHSDCDSSSVIDDDDDIA.....SSRRRNPPFQFDLNFPLDCVDLFGADDLHCTDLRL      | 225 |
| At1g53170 | TCGVQSESETSSVVD..FEGGAGKISPP.....LDLNLNLPPEAE                      | 185 |
| PhERF6    | GGTCGSESDSSVIDFNHVKPTIKGLN.....LDLNFPPENMM                         | 220 |
| PhERF7    | TQDCRSDCDSSSVVDDRCDDVD....QTSSLMQKQPLPFDLNLPPPLSDDA...AADDLHV TALC | 206 |
| PhERF8    | PDCRSDCDSSSVVVDGECGDGENDVIVSSFRKPLPFDLNLPPPEMDDVD....SDELRC TELC   | 215 |
|           | CMVIII-2                                                           |     |
|           | CMVIII-1 (EAR)                                                     |     |

**Supplementary Fig. S1c:** Amino acid sequence alignment of Group V ERFs that includes PhERF6, PhERF7, PhERF8, At1g28370/AtERF11, At1g50640 /AtERF3 and At1g53170/AtERF8 using DNAMAN program. Conserved residues are shaded in black. Grey shading indicates similar residues in five out of six of the sequences. The filled black bar below the sequences represents the CMVIII-1 (EAR) motif and the gray bar below the sequences represents the CMVIII-2 motif.
